# Supplementary material
Source: PubMed Central journal article supplement (PMC10783553)
Supplement: NIHMS1676944-supplement-Supporting_Information.pdf [file NIHMS1676944-supplement-Supporting_Information.pdf]

## Supporting Information

**Creating Physicochemical Gradients in Modular Microporous Annealed Particle Hydrogels via a Microfluidic Method***Shangjing Xin, Jing Dai, Carl A. Gregory, Arum Han, and Daniel L. Alge\****Table 1.** Components of two microgel precursor solutions for fluorescent intensity, stiffness, and degradability gradients.

| Components  | Fluorescent Intensity |         | Stiffness |        | Degradability |                      |
|-------------|-----------------------|---------|-----------|--------|---------------|----------------------|
|             | A                     | B       | A         | B      | A             | B                    |
|             | PEG-Nb <sup>a</sup>   | PEG-Nb  | PEG-Nb    | PEG-Nb | PEG-Nb        | PEG-Nb               |
| Macromer    | 5kDa                  | 5kDa    | 5kDa      | 20kDa  | 5kDa          | 5kDa                 |
|             | 18.2 mM               | 18.2 mM | 18.2 mM   | 4.9 mM | 18.2 mM       | 18.2 mM              |
| Crosslinker | PEG-DT <sup>b</sup>   | PEG-DT  | PEG-DT    | PEG-DT | PEG-DT        | peptide <sup>a</sup> |
|             | 26.9 mM               | 26.9 mM | 26.9 mM   | 6.8 mM | 26.9 mM       | 26.9 mM              |
| LAP         | 2 mM                  | 2 mM    | 2 mM      | 2 mM   | 2 mM          | 2 mM                 |
| CGRGDS      | 1 mM                  | 1 mM    | 1 mM      | 1 mM   | 1 mM          | 1 mM                 |
| SAMSA-FITC  | 100 μM                | -       | -         | -      | -             | -                    |

<sup>a</sup>PEG-Nb represented PEG-norbornene<sup>b</sup>PEG-DT represented PEG-dithiol<sup>c</sup>Peptide sequence was KCGPQGIWGQCK

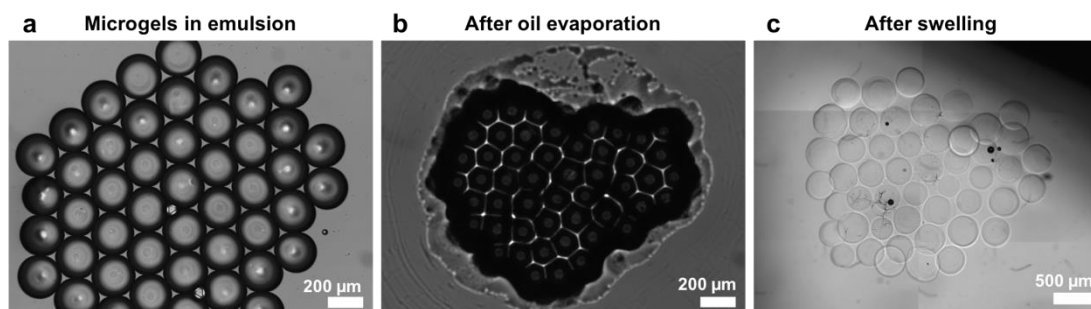

**Figure S1.** Microscopic images showing complete removal of the fluorinated oil after oil evaporation and microgel reswelling.

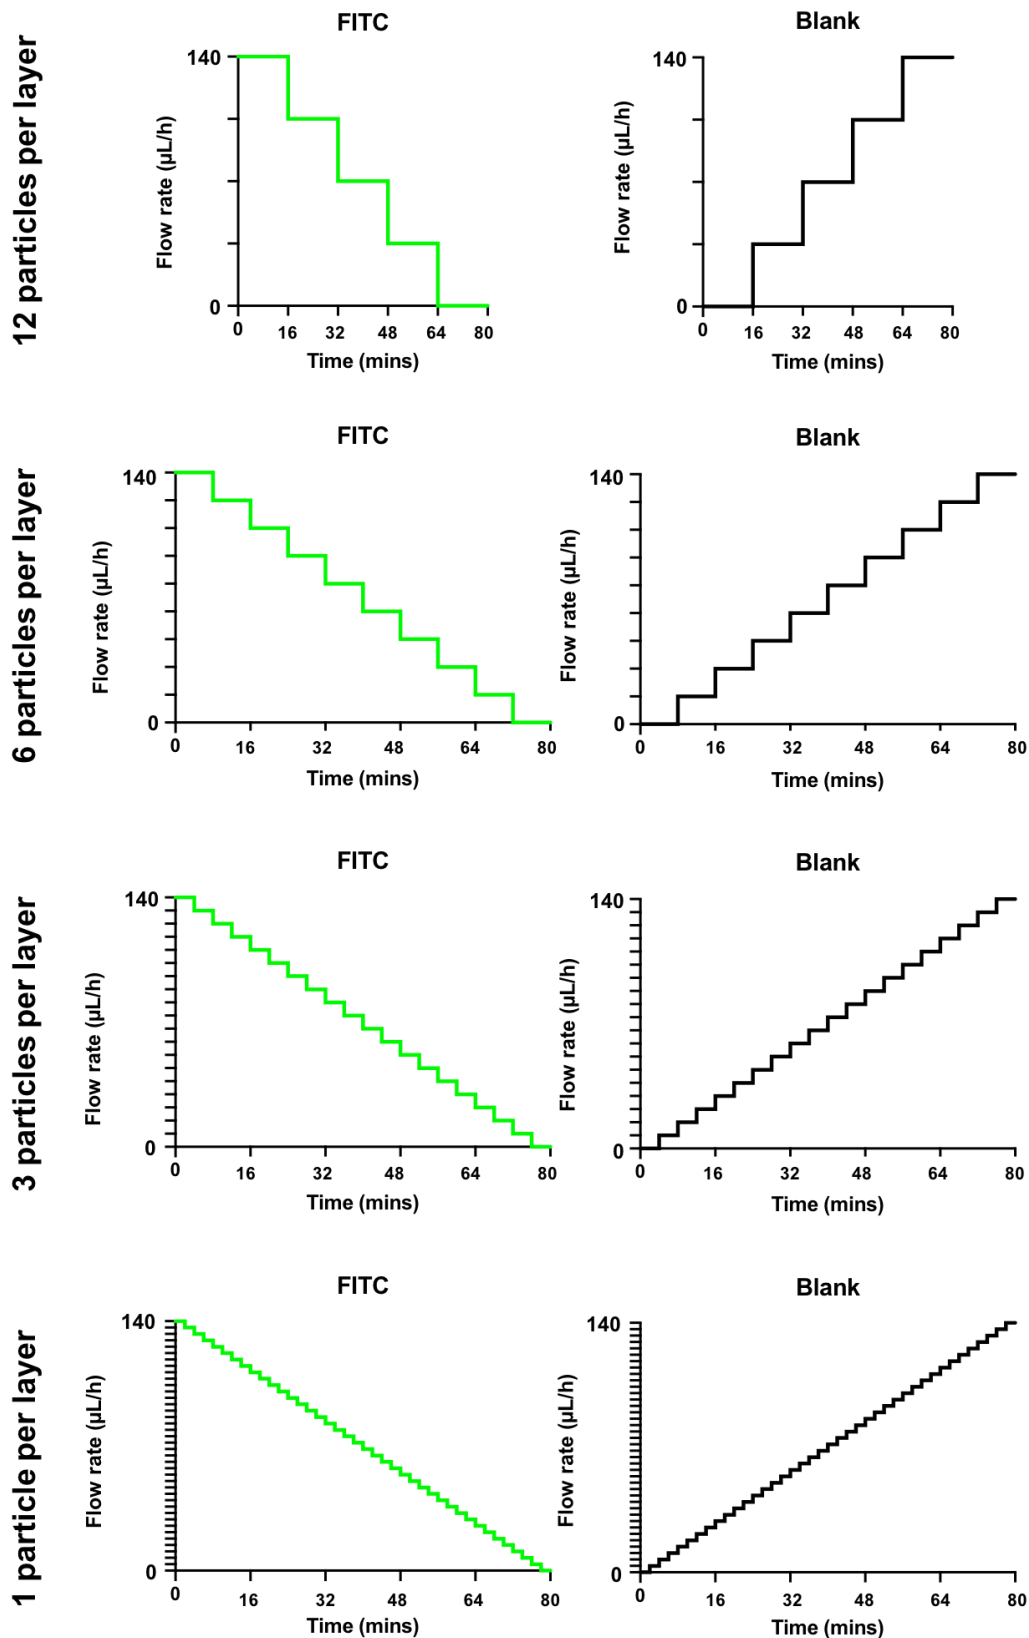

**Figure S2.** Flow rate profiles of the two precursor solutions for fluorescent intensity gradients with varying layer thickness.

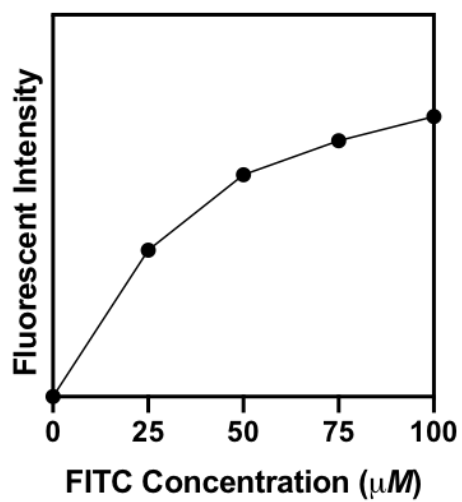

**Figure S3.** Standard curve of SAMSA-FITC fluorescent intensity from 0-100  $\mu\text{M}$ .
